# Supplementary material
Source: PubMed Central journal article supplement (PMC7956219)

Figure S1

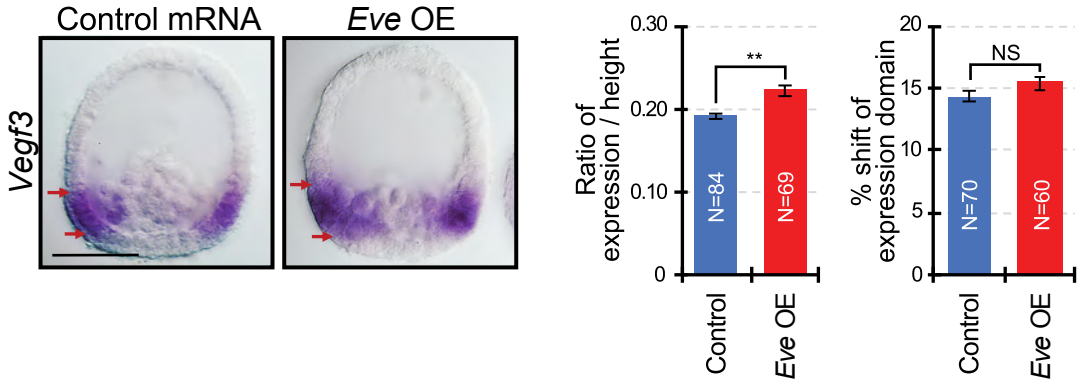

Supplement: NIHMS1668030-supplement-1.pdf [file NIHMS1668030-supplement-1.pdf]

Figure S2

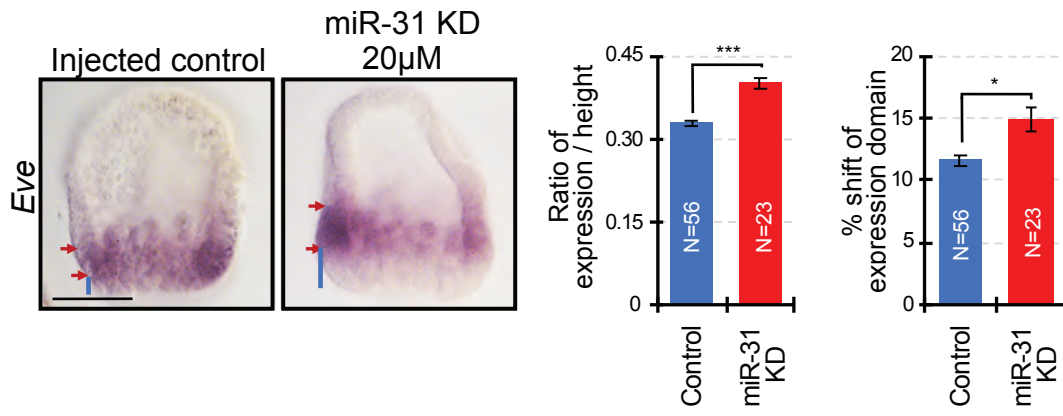

Supplement: NIHMS1668030-supplement-2.pdf [file NIHMS1668030-supplement-2.pdf]
